# Supplementary material for: Absolute configurations of talaromycones A and B, α-diversonolic ester, and aspergillusone B from endophytic Talaromyces sp. ECN211
Source: publisher site journal article supplement (doi:10.3762/bjoc.16.28), 2020-02-28

# checkCIF/PLATON report

You have not supplied any structure factors. As a result the full set of tests cannot be run.

THIS REPORT IS FOR GUIDANCE ONLY. IF USED AS PART OF A REVIEW PROCEDURE FOR PUBLICATION, IT SHOULD NOT REPLACE THE EXPERTISE OF AN EXPERIENCED CRYSTALLOGRAPHIC REFEREE.

No syntax errors found.      CIF dictionary      Interpreting this report

## Datablock: 514

---

Bond precision:    C-C = 0.0074 Å                      Wavelength=1.54187

Cell:                      a=8.7229(4)              b=8.3549(3)              c=21.0702(15)  
                            alpha=90              beta=101.725(3)              gamma=90  
Temperature:              296 K

|                        | Calculated  | Reported    |
|------------------------|-------------|-------------|
| Volume                 | 1503.53(14) | 1503.53(14) |
| Space group            | P 21        | P 1 21 1    |
| Hall group             | P 2yb       | P 2yb       |
| Moiety formula         | C16 H16 O7  | C16 H16 O7  |
| Sum formula            | C16 H16 O7  | C16 H16 O7  |
| Mr                     | 320.29      | 320.30      |
| Dx, g cm <sup>-3</sup> | 1.415       | 1.415       |
| Z                      | 4           | 4           |
| Mu (mm <sup>-1</sup> ) | 0.952       | 0.955       |
| F000                   | 672.0       | 672.0       |
| F000'                  | 674.47      |             |
| h,k,lmax               | 10,10,25    | 10,9,25     |
| Nref                   | 5483[ 2947] | 4850        |
| Tmin,Tmax              | 0.892,0.953 |             |
| Tmin'                  | 0.751       |             |

Correction method= Not given

Data completeness= 1.65/0.88                      Theta(max)= 67.978

R(reflections)= 0.0618( 4414)                      wR2(reflections)= 0.1720( 4850)

S = 1.005                      Npar= 425

---

The following ALERTS were generated. Each ALERT has the format  
**test-name\_ALERT\_alert-type\_alert-level.**  
Click on the hyperlinks for more details of the test.

---

## ● Alert level C

RINTA01\_ALERT\_3\_C The value of Rint is greater than 0.12  
Rint given 0.122

|                   |                                                    |         |        |
|-------------------|----------------------------------------------------|---------|--------|
| PLAT089_ALERT_3_C | Poor Data / Parameter Ratio (Zmax < 18) .....      | 6.93    | Note   |
| PLAT213_ALERT_2_C | Atom O207 has ADP max/min Ratio .....              | 3.6     | prolat |
| PLAT220_ALERT_2_C | Non-Solvent Resd 2 C Ueq(max)/Ueq(min) Range       | 3.3     | Ratio  |
| PLAT220_ALERT_2_C | Non-Solvent Resd 2 O Ueq(max)/Ueq(min) Range       | 3.4     | Ratio  |
| PLAT234_ALERT_4_C | Large Hirshfeld Difference C213 --C214 .           | 0.19    | Ang.   |
| PLAT242_ALERT_2_C | Low 'MainMol' Ueq as Compared to Neighbors of C213 |         | Check  |
| PLAT250_ALERT_2_C | Large U3/U1 Ratio for Average U(i,j) Tensor ....   | 2.3     | Note   |
| PLAT260_ALERT_2_C | Large Average Ueq of Residue Including O201        | 0.106   | Check  |
| PLAT340_ALERT_3_C | Low Bond Precision on C-C Bonds .....              | 0.00737 | Ang.   |

---

## ● Alert level G

CHEMS02\_ALERT\_1\_G Please check that you have entered the correct  
\_publ\_requested\_category classification of your compound;  
FI or CI or EI for inorganic; FM or CM or EM for metal-organic;  
FO or CO or EO for organic.  
From the CIF: \_publ\_requested\_category CHOOSE FI FM FO CI CM CO or A  
From the CIF: \_chemical\_formula\_sum :C16 H16 O7

|                   |                                                |       |          |
|-------------------|------------------------------------------------|-------|----------|
| PLAT007_ALERT_5_G | Number of Unrefined Donor-H Atoms .....        | 6     | Report   |
| PLAT020_ALERT_3_G | The Value of Rint is Greater Than 0.12 .....   | 0.122 | Report   |
| PLAT072_ALERT_2_G | SHELXL First Parameter in WGHT Unusually Large | 0.11  | Report   |
| PLAT791_ALERT_4_G | Model has Chirality at C103 (Chiral SPGR)      |       | R Verify |
| PLAT791_ALERT_4_G | Model has Chirality at C104 (Chiral SPGR)      |       | R Verify |
| PLAT791_ALERT_4_G | Model has Chirality at C203 (Chiral SPGR)      |       | R Verify |
| PLAT791_ALERT_4_G | Model has Chirality at C204 (Chiral SPGR)      |       | R Verify |

---

0 **ALERT level A** = Most likely a serious problem - resolve or explain

0 **ALERT level B** = A potentially serious problem, consider carefully

10 **ALERT level C** = Check. Ensure it is not caused by an omission or oversight

8 **ALERT level G** = General information/check it is not something unexpected

1 **ALERT type 1** CIF construction/syntax error, inconsistent or missing data

7 **ALERT type 2** Indicator that the structure model may be wrong or deficient

4 **ALERT type 3** Indicator that the structure quality may be low

5 **ALERT type 4** Improvement, methodology, query or suggestion

1 **ALERT type 5** Informative message, check

---

---

It is advisable to attempt to resolve as many as possible of the alerts in all categories. Often the minor alerts point to easily fixed oversights, errors and omissions in your CIF or refinement strategy, so attention to these fine details can be worthwhile. In order to resolve some of the more serious problems it may be necessary to carry out additional measurements or structure refinements. However, the purpose of your study may justify the reported deviations and the more serious of these should normally be commented upon in the discussion or experimental section of a paper or in the "special\_details" fields of the CIF. checkCIF was carefully designed to identify outliers and unusual parameters, but every test has its limitations and alerts that are not important in a particular case may appear. Conversely, the absence of alerts does not guarantee there are no aspects of the results needing attention. It is up to the individual to critically assess their own results and, if necessary, seek expert advice.

### **Publication of your CIF in IUCr journals**

A basic structural check has been run on your CIF. These basic checks will be run on all CIFs submitted for publication in IUCr journals (*Acta Crystallographica*, *Journal of Applied Crystallography*, *Journal of Synchrotron Radiation*); however, if you intend to submit to *Acta Crystallographica Section C* or *E* or *IUCrData*, you should make sure that full publication checks are run on the final version of your CIF prior to submission.

### **Publication of your CIF in other journals**

Please refer to the *Notes for Authors* of the relevant journal for any special instructions relating to CIF submission.

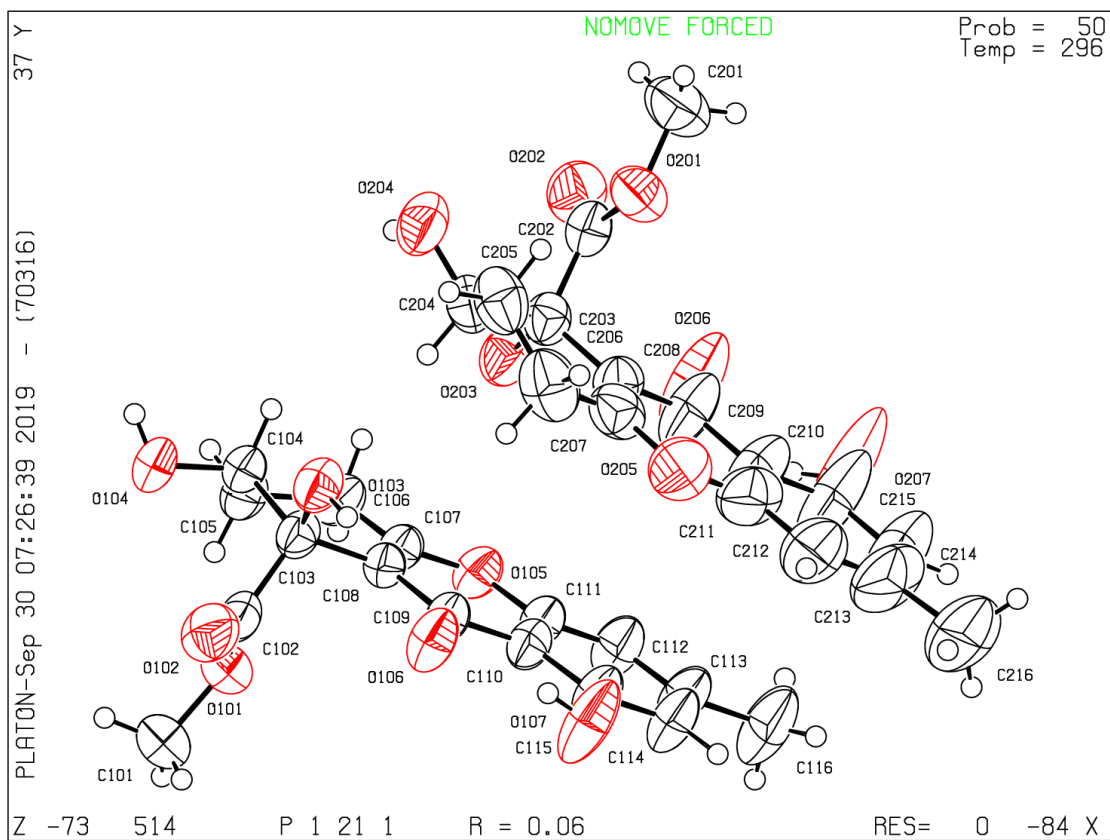

Supplement: Additional file 2 [file checkcif3.pdf › Crystal files/checkcif3.pdf]
