# Supplementary material for: Absolute configurations of talaromycones A and B, α-diversonolic ester, and aspergillusone B from endophytic Talaromyces sp. ECN211
Source: publisher site journal article supplement (doi:10.3762/bjoc.16.28), 2020-02-28
Supplement: Additional file 1 [file 1860-5397-16-28-S1.pdf]

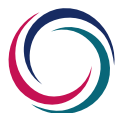

## Supporting Information

for

### **Absolute configurations of talaromycones A and B, $\alpha$ -diversonolic ester, and aspergillusone B from endophytic *Talaromyces* sp. ECN211**

Ken-ichi Nakashima, Junko Tomida, Takao Hirai, Yoshiaki Kawamura and Makoto Inoue

*Beilstein J. Org. Chem.* **2020**, *16*, 290–296. [doi:10.3762/bjoc.16.28](https://doi.org/10.3762/bjoc.16.28)

### **A phylogenetic tree for ECN211 and related species and NMR spectra of 1 and 2**

## Table of Contents

Figure S1: A phylogenetic tree for ECN211 and related species based on the D1/D2 domain of 26SrDNA sequences.

Figure S2:  $^1\text{H}$  NMR spectrum (400 MHz,  $\text{CDCl}_3$ ) of **1**

Figure S3:  $^{13}\text{C}$  NMR and DEPT-135 spectra (100 MHz,  $\text{CDCl}_3$ ) of **1**

Figure S4: HMQC spectrum ( $\text{CDCl}_3$ ) of **1**

Figure S5: HMBC spectrum ( $\text{CDCl}_3$ ) of **1**

Figure S6:  $^1\text{H}$  NMR spectrum (400 MHz,  $\text{CDCl}_3$ ) of **2**

Figure S7:  $^{13}\text{C}$  NMR and DEPT-135 spectra (100 MHz,  $\text{CDCl}_3$ ) of **2**

Figure S8: HMQC spectrum ( $\text{CDCl}_3$ ) of **2**

Figure S9: HMBC spectrum ( $\text{CDCl}_3$ ) of **2**

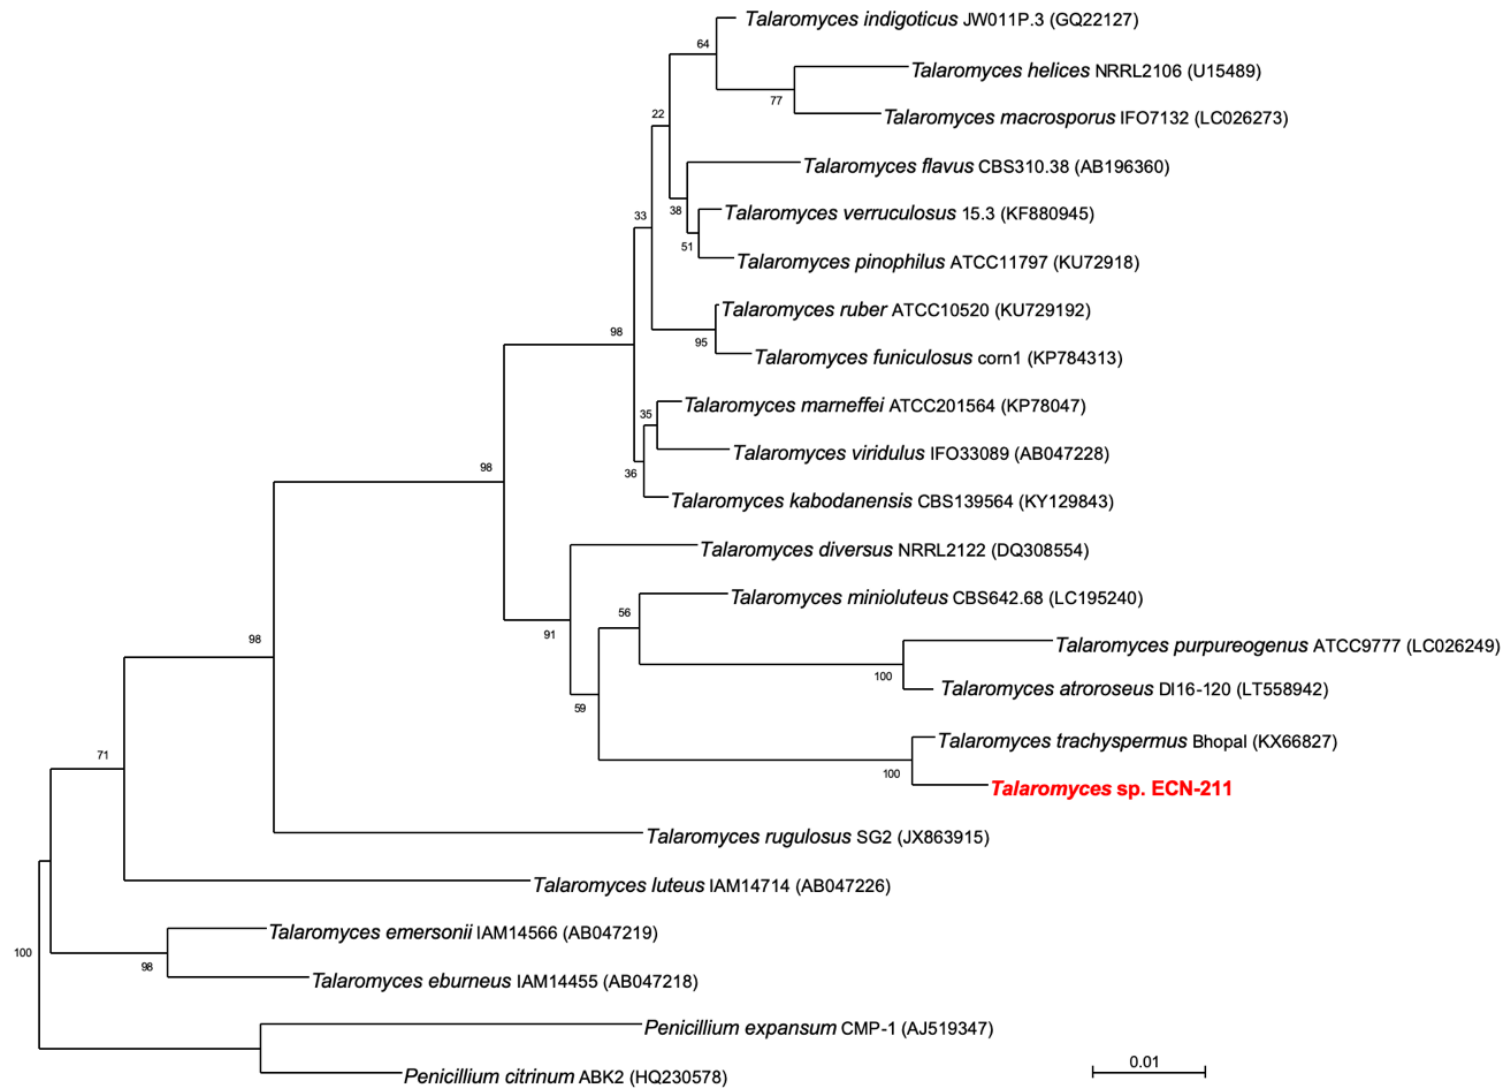

Figure S1: A phylogenetic tree for ECN211 and related species based on the D1/D2 domain of 26S rDNA sequences.

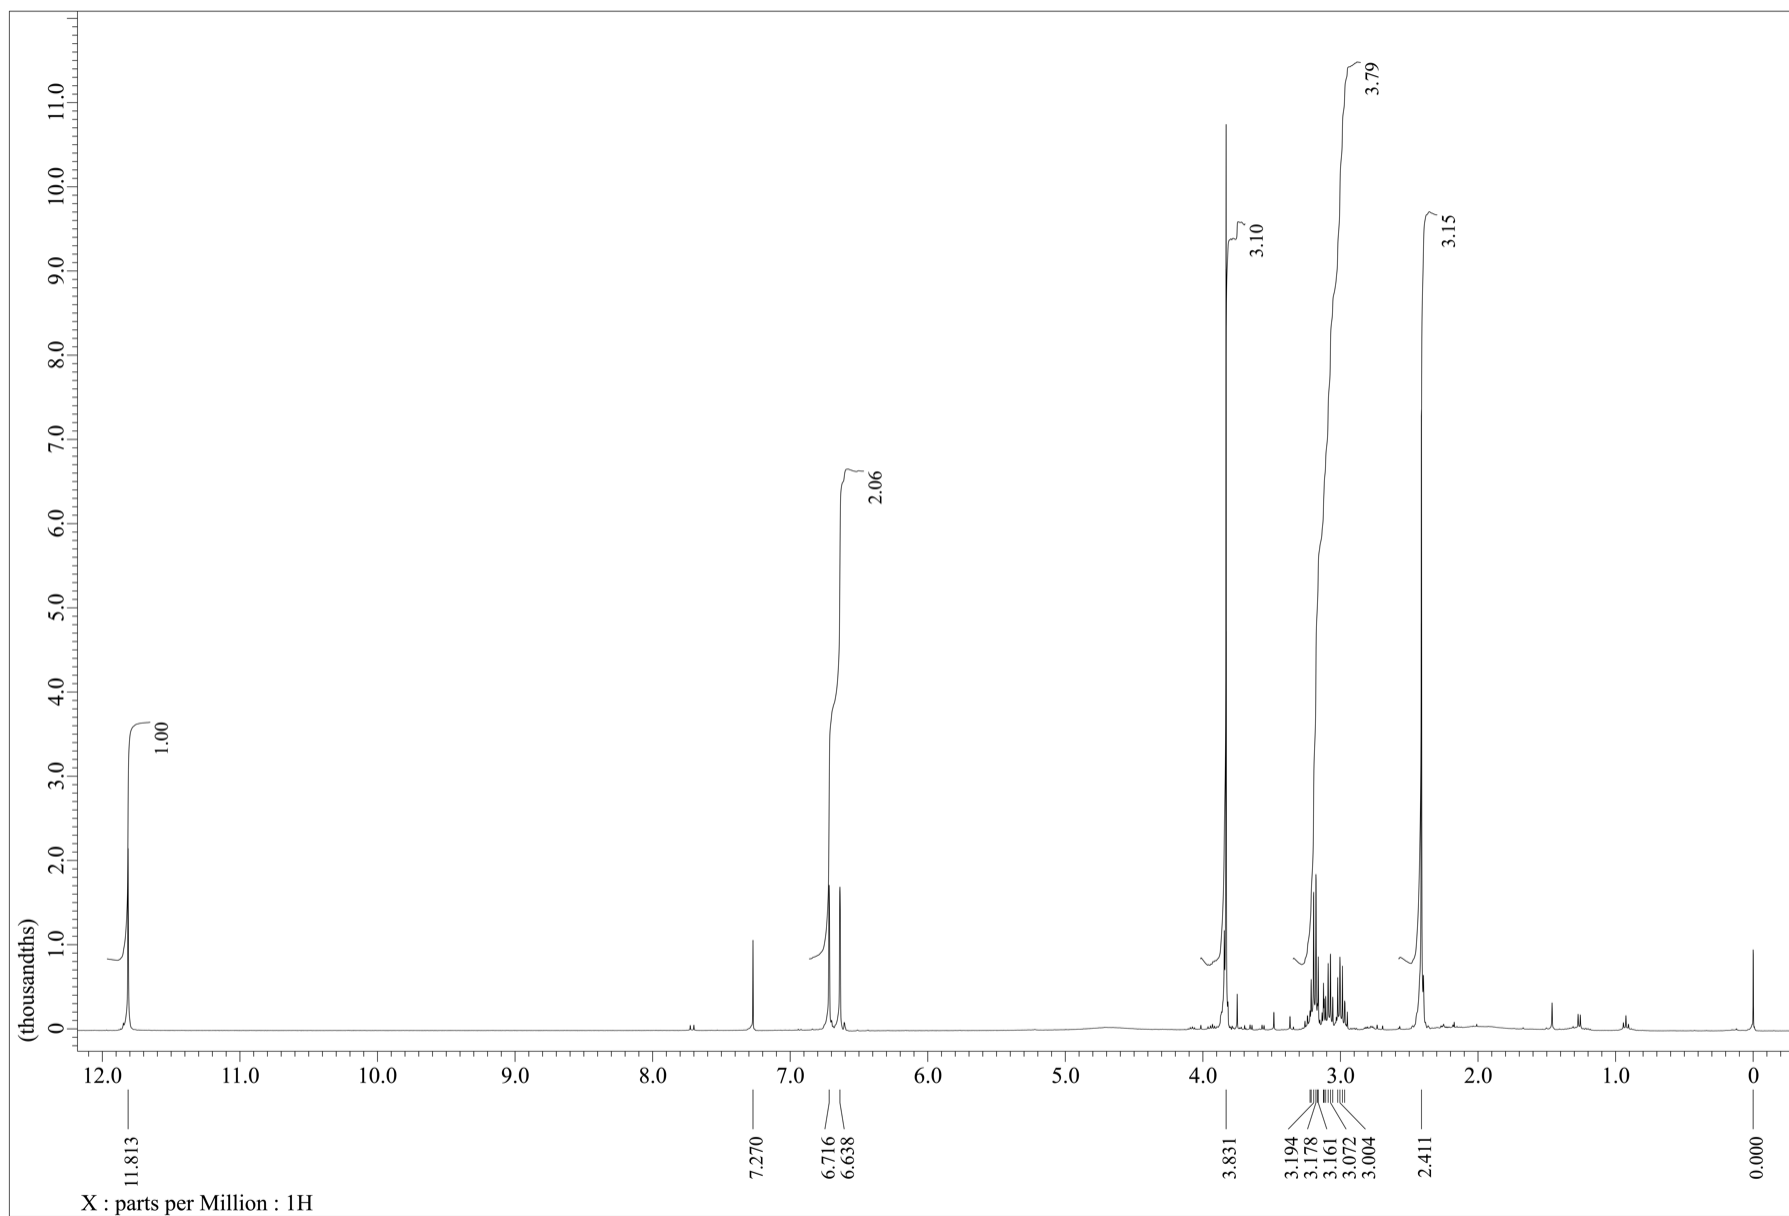

Figure S2: <sup>1</sup>H NMR spectrum (400 MHz, CDCl<sub>3</sub>) of **1**.

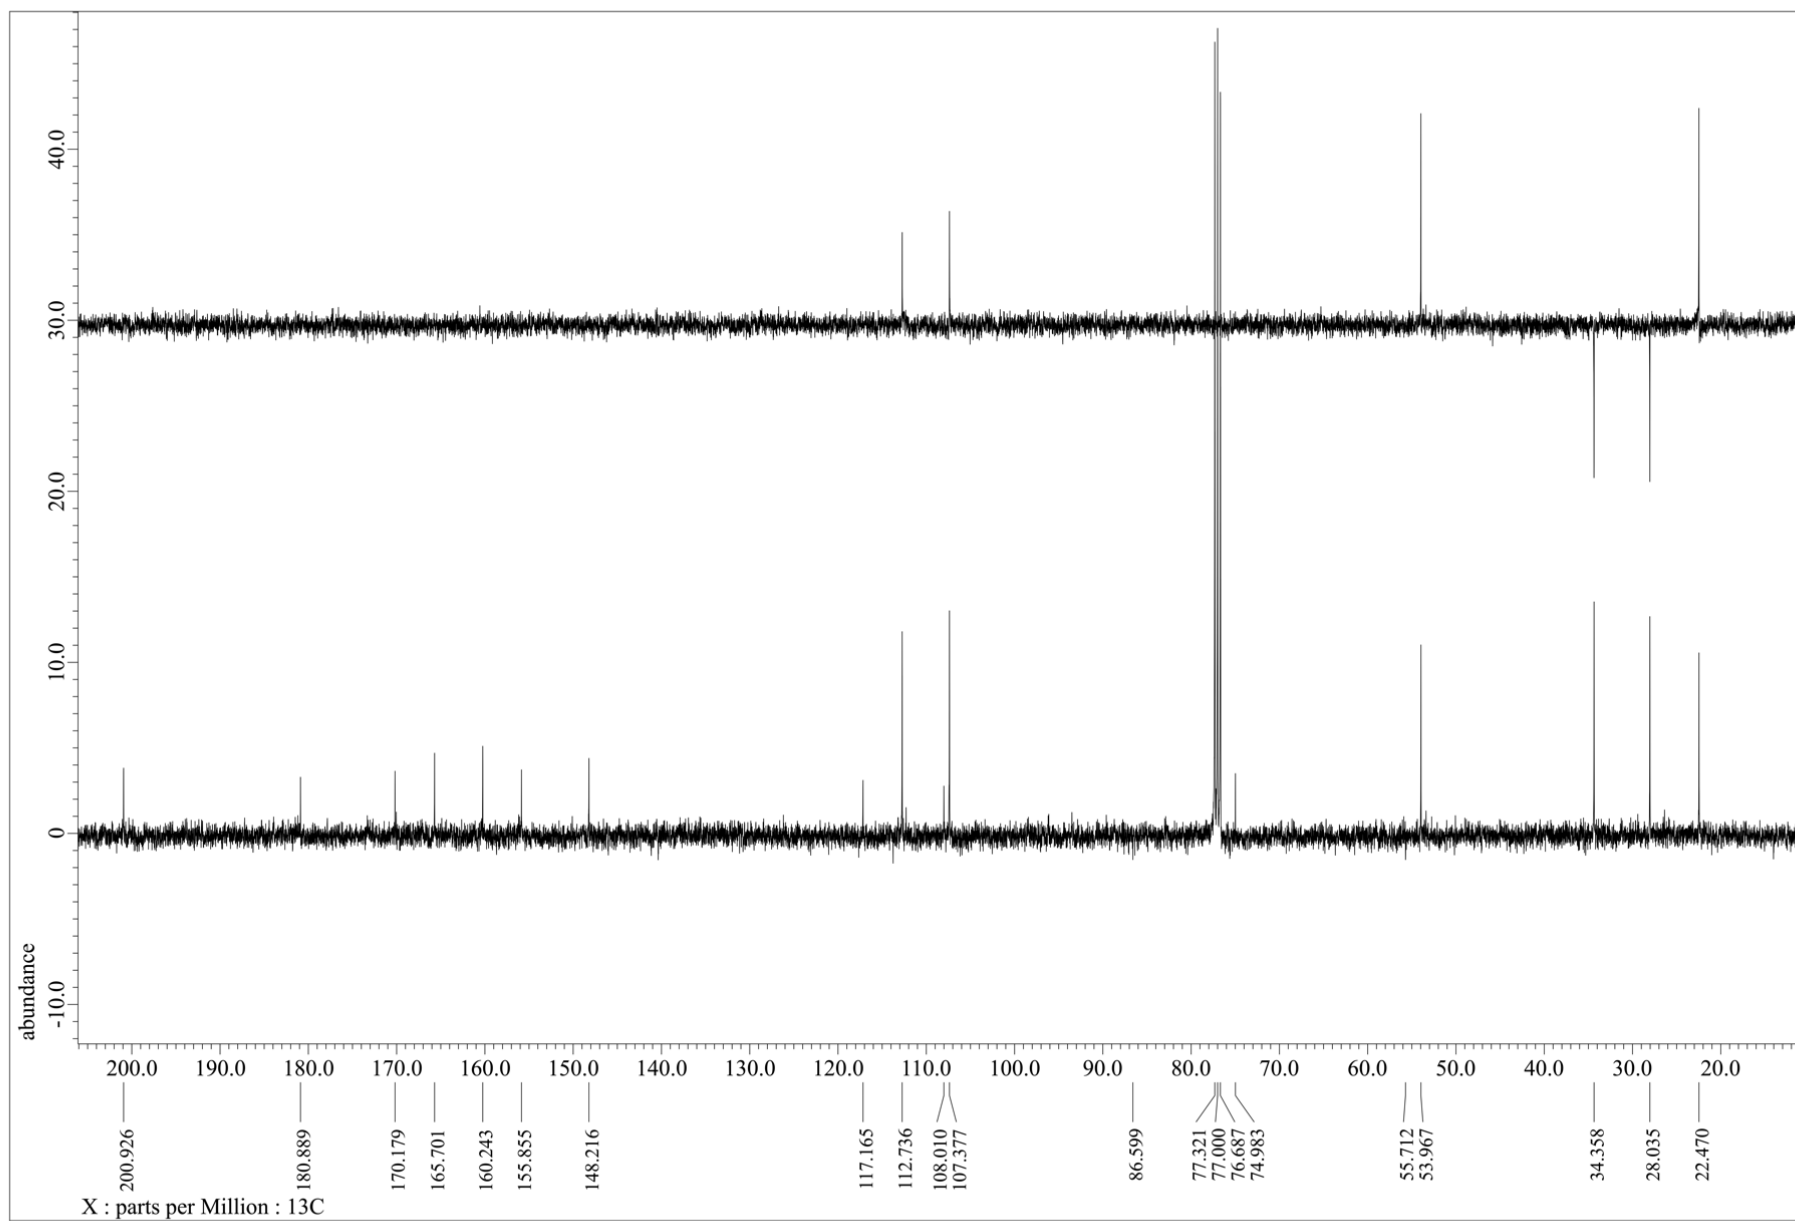

Figure S3:  $^{13}\text{C}$  NMR and DEPT-135 spectra (100 MHz,  $\text{CDCl}_3$ ) of **1**.

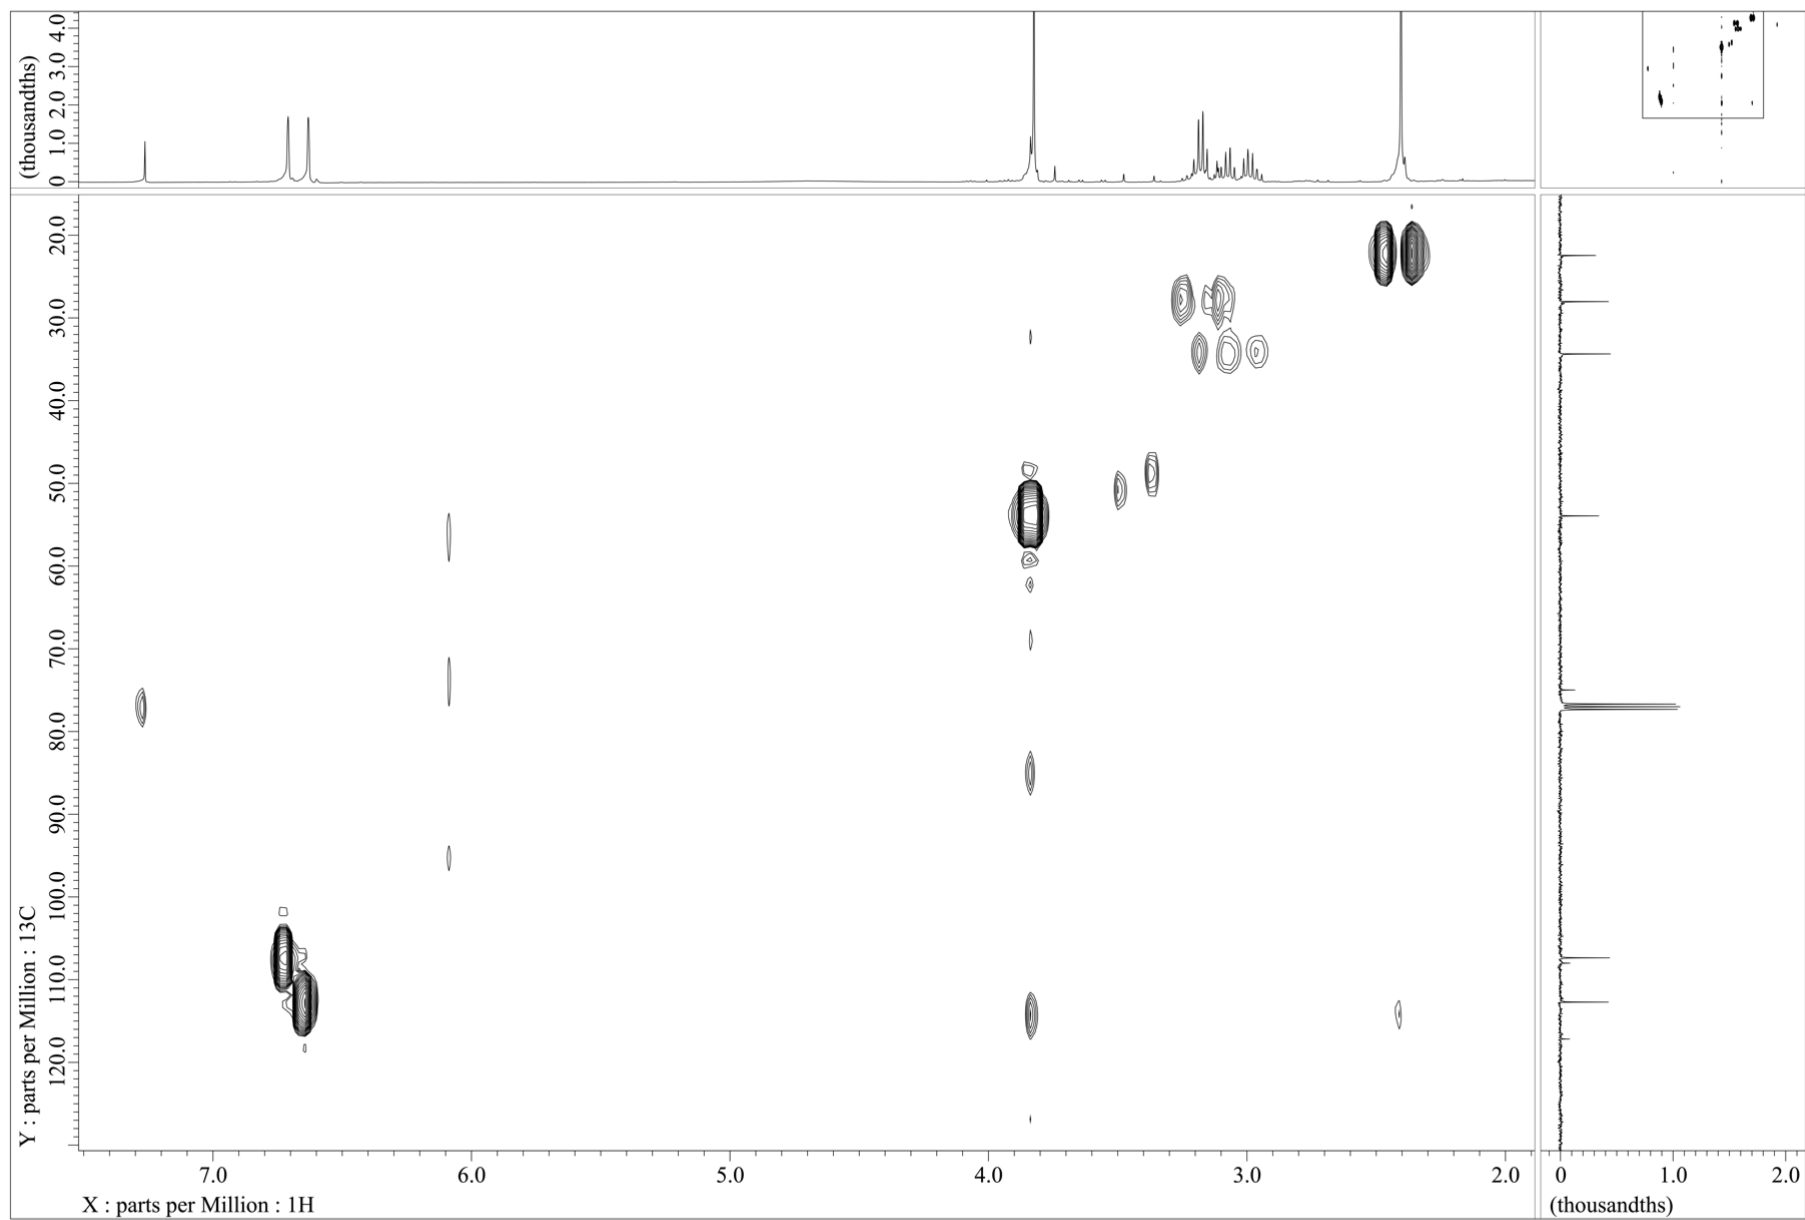

Figure S4: HMQC spectrum ( $\text{CDCl}_3$ ) of **1**.

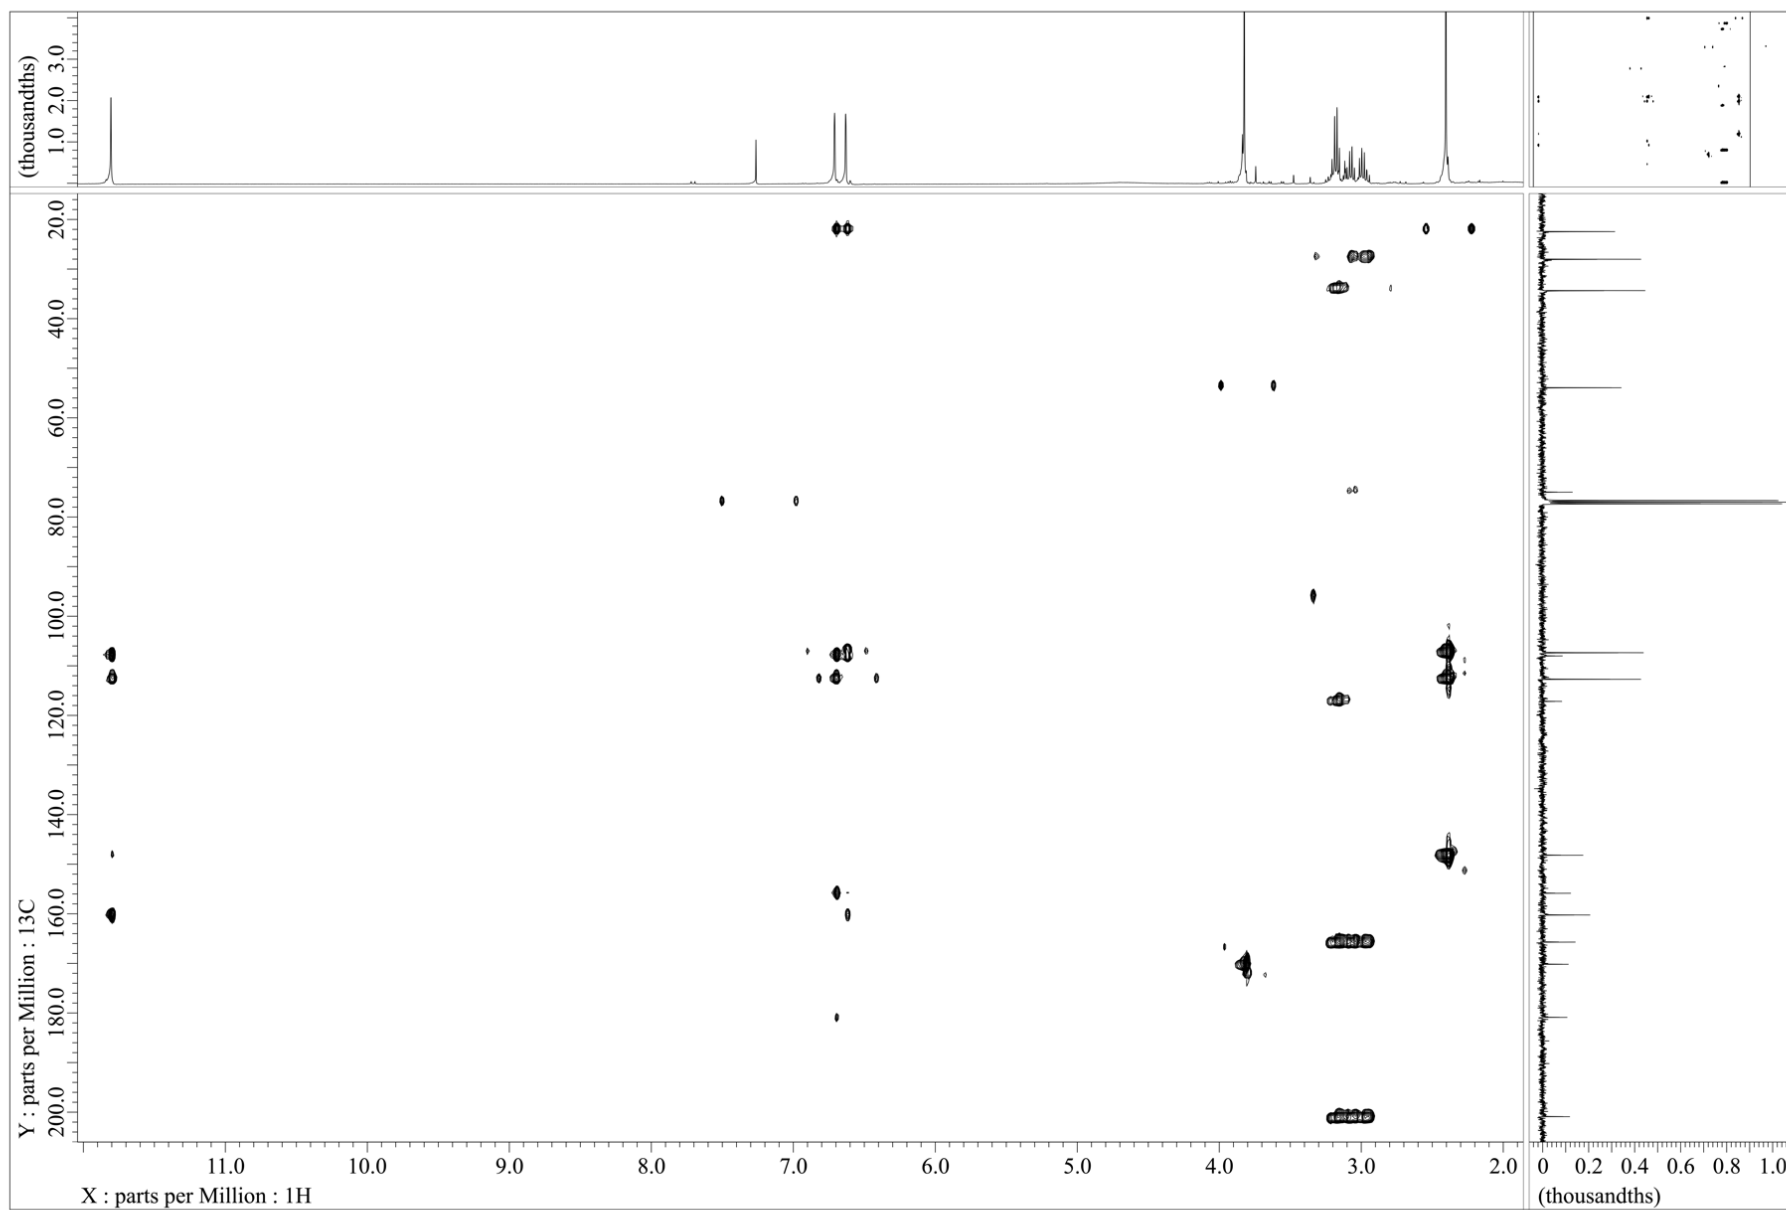

Figure S5: HMBC spectrum ( $\text{CDCl}_3$ ) of **1**.

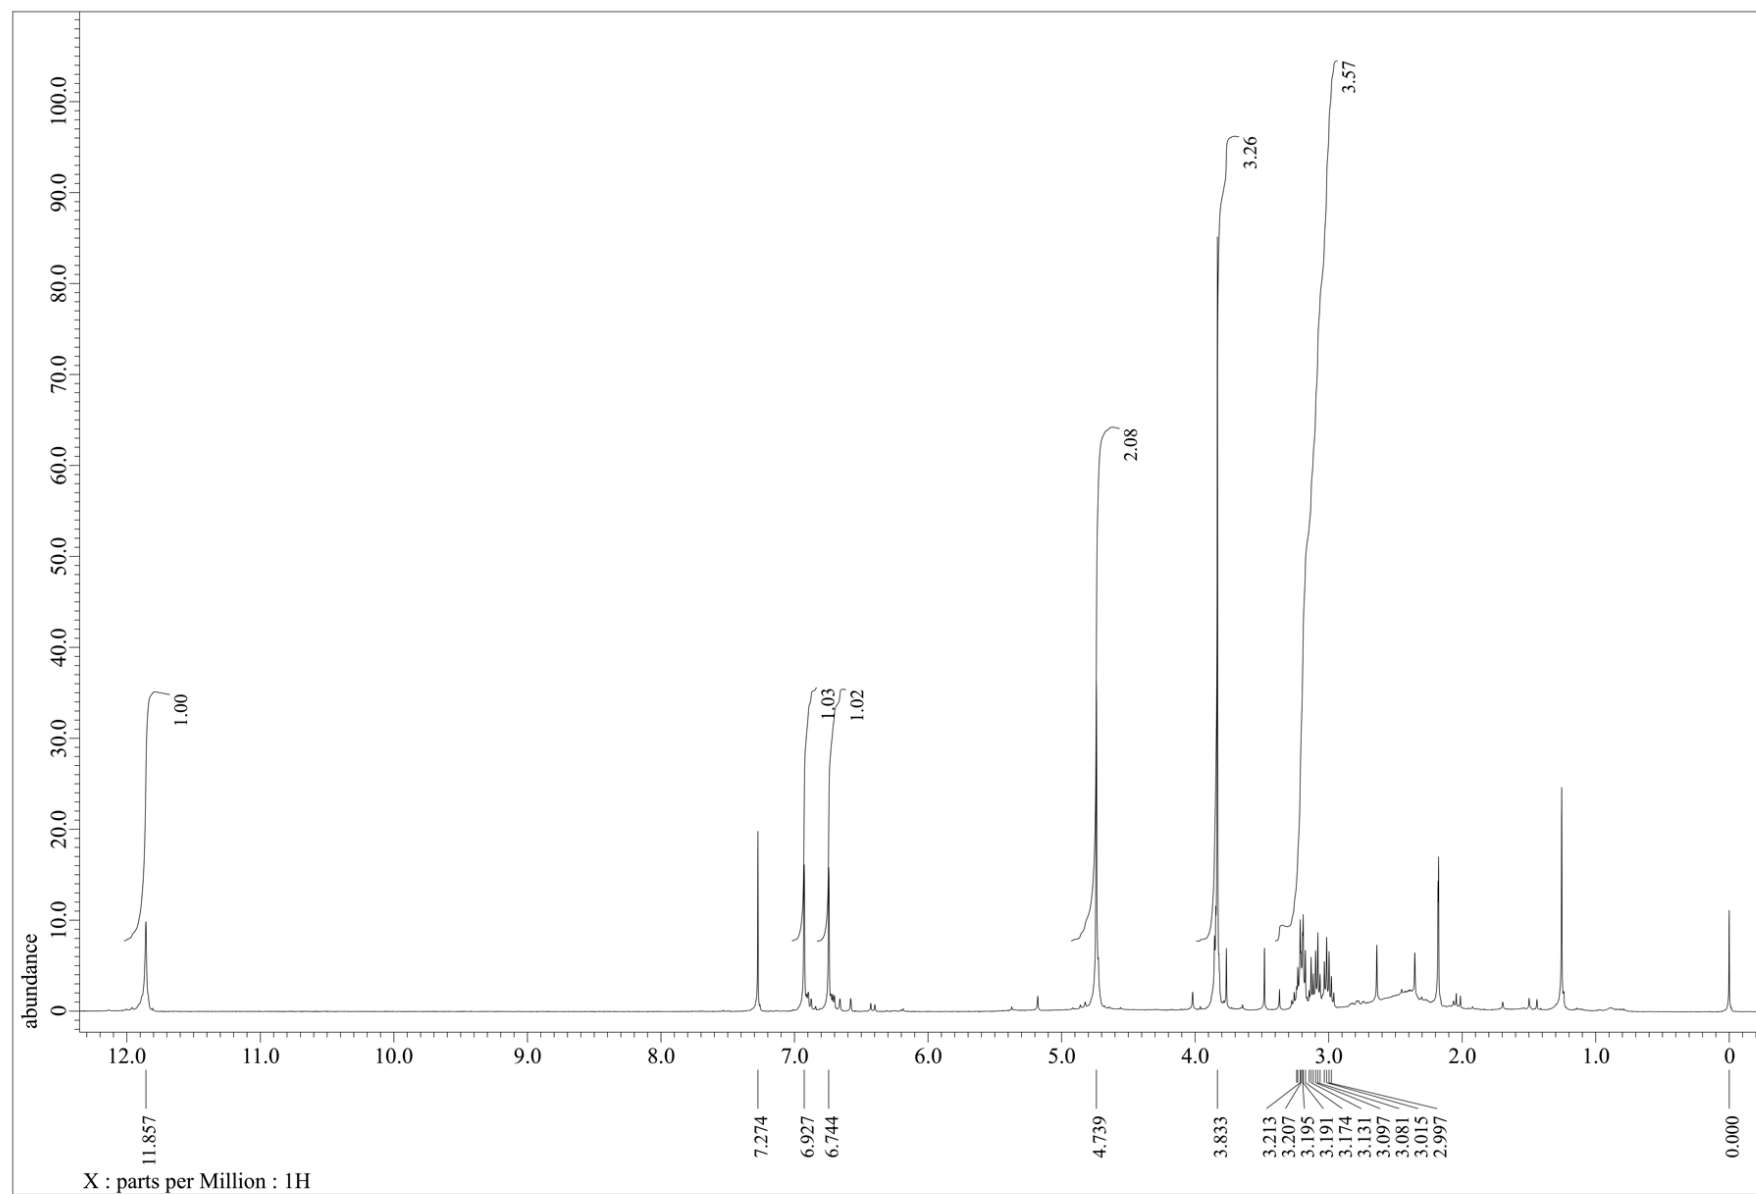

Figure S6: <sup>1</sup>H NMR spectrum (400 MHz, CDCl<sub>3</sub>) of **2**.



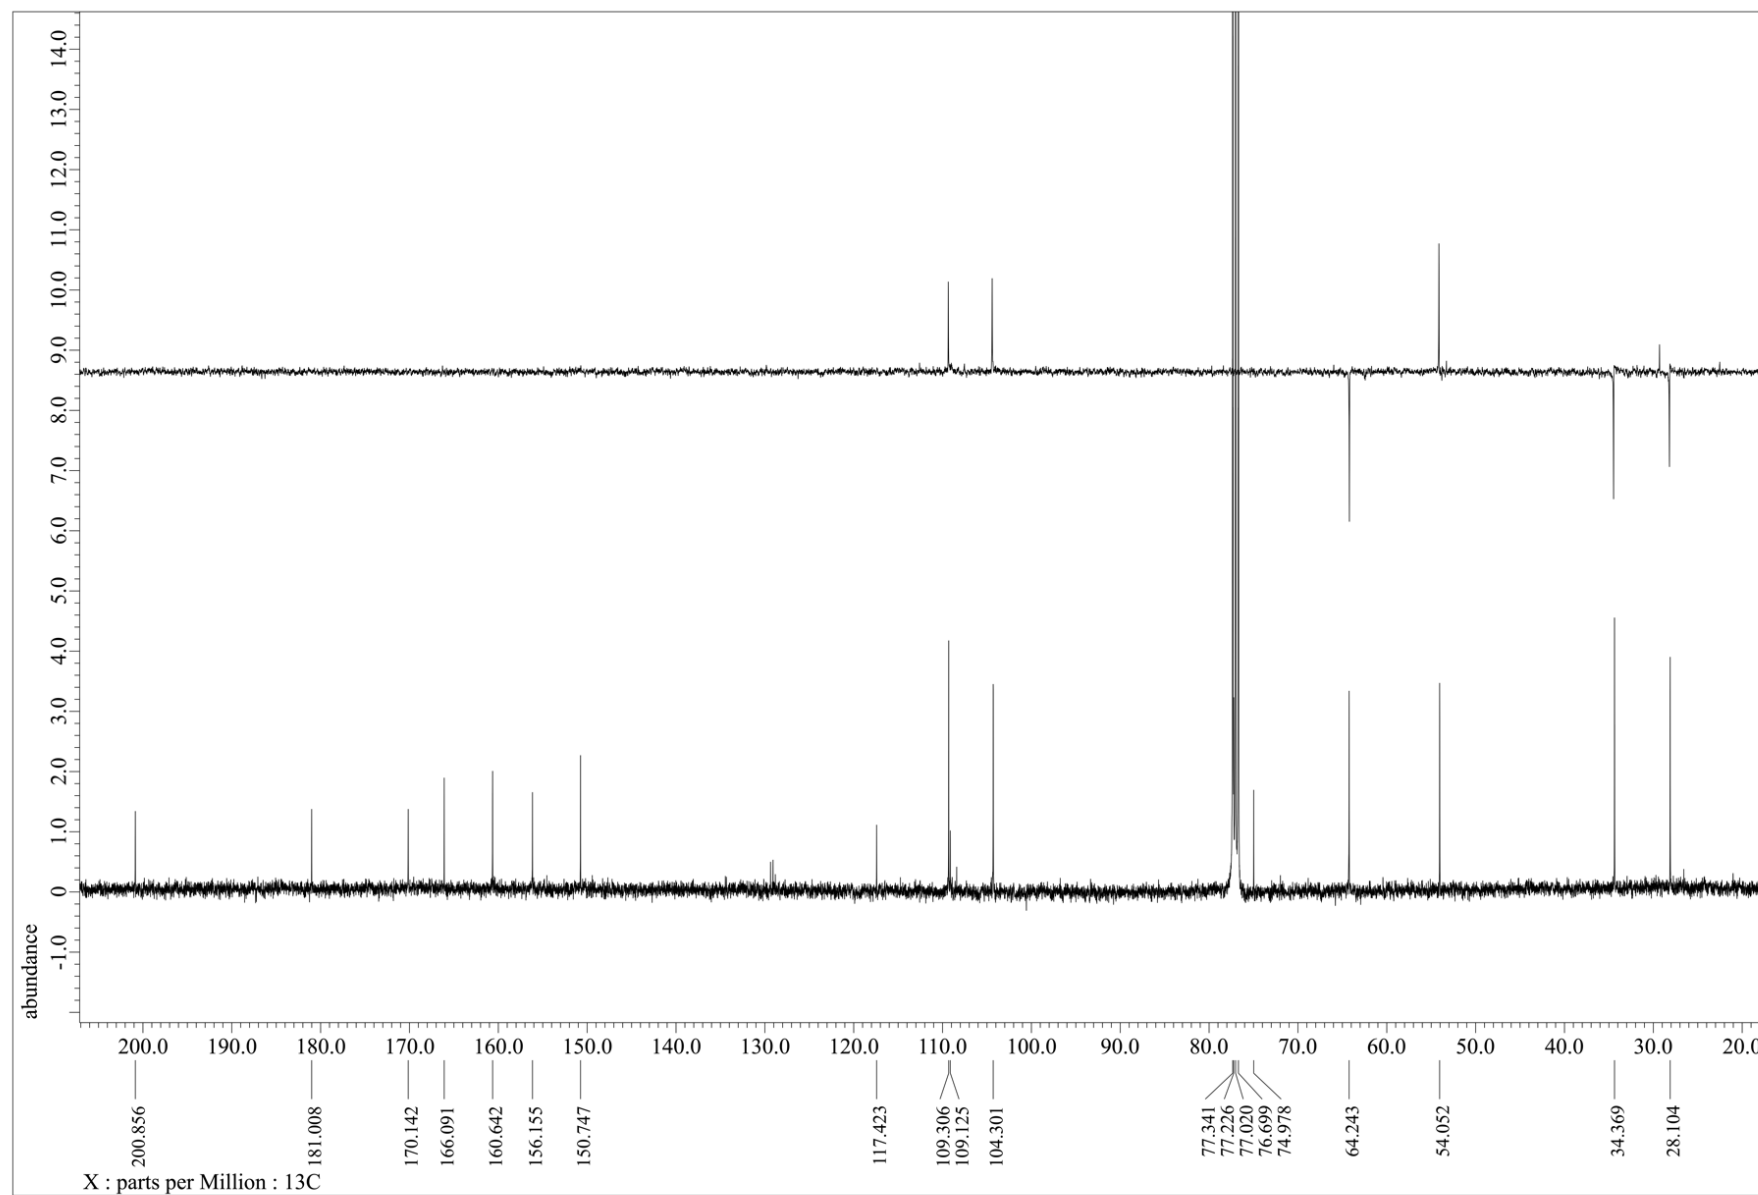

Figure S7:  $^{13}\text{C}$  NMR and DEPT-135 spectra (100 MHz,  $\text{CDCl}_3$ ) of **2**.

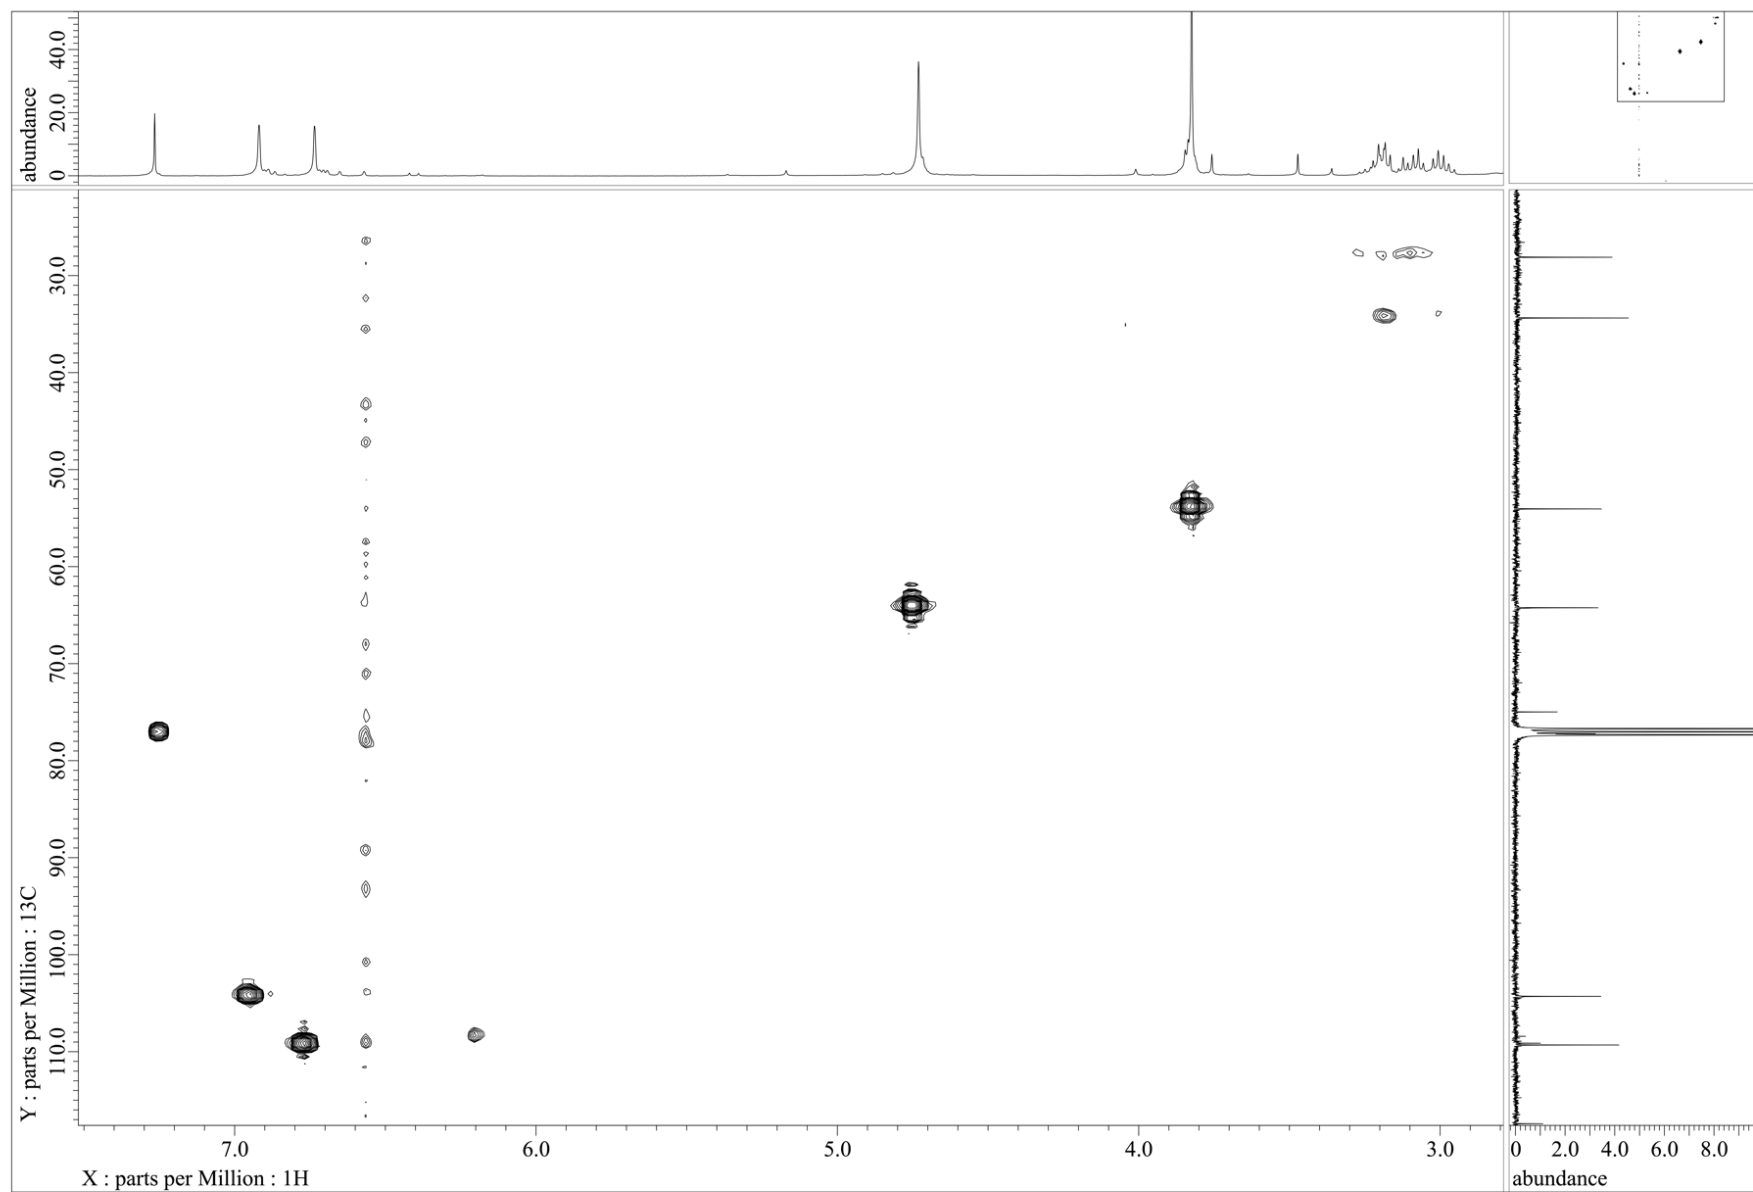

Figure S8: HMQC spectrum (CDCl<sub>3</sub>) of **2**.

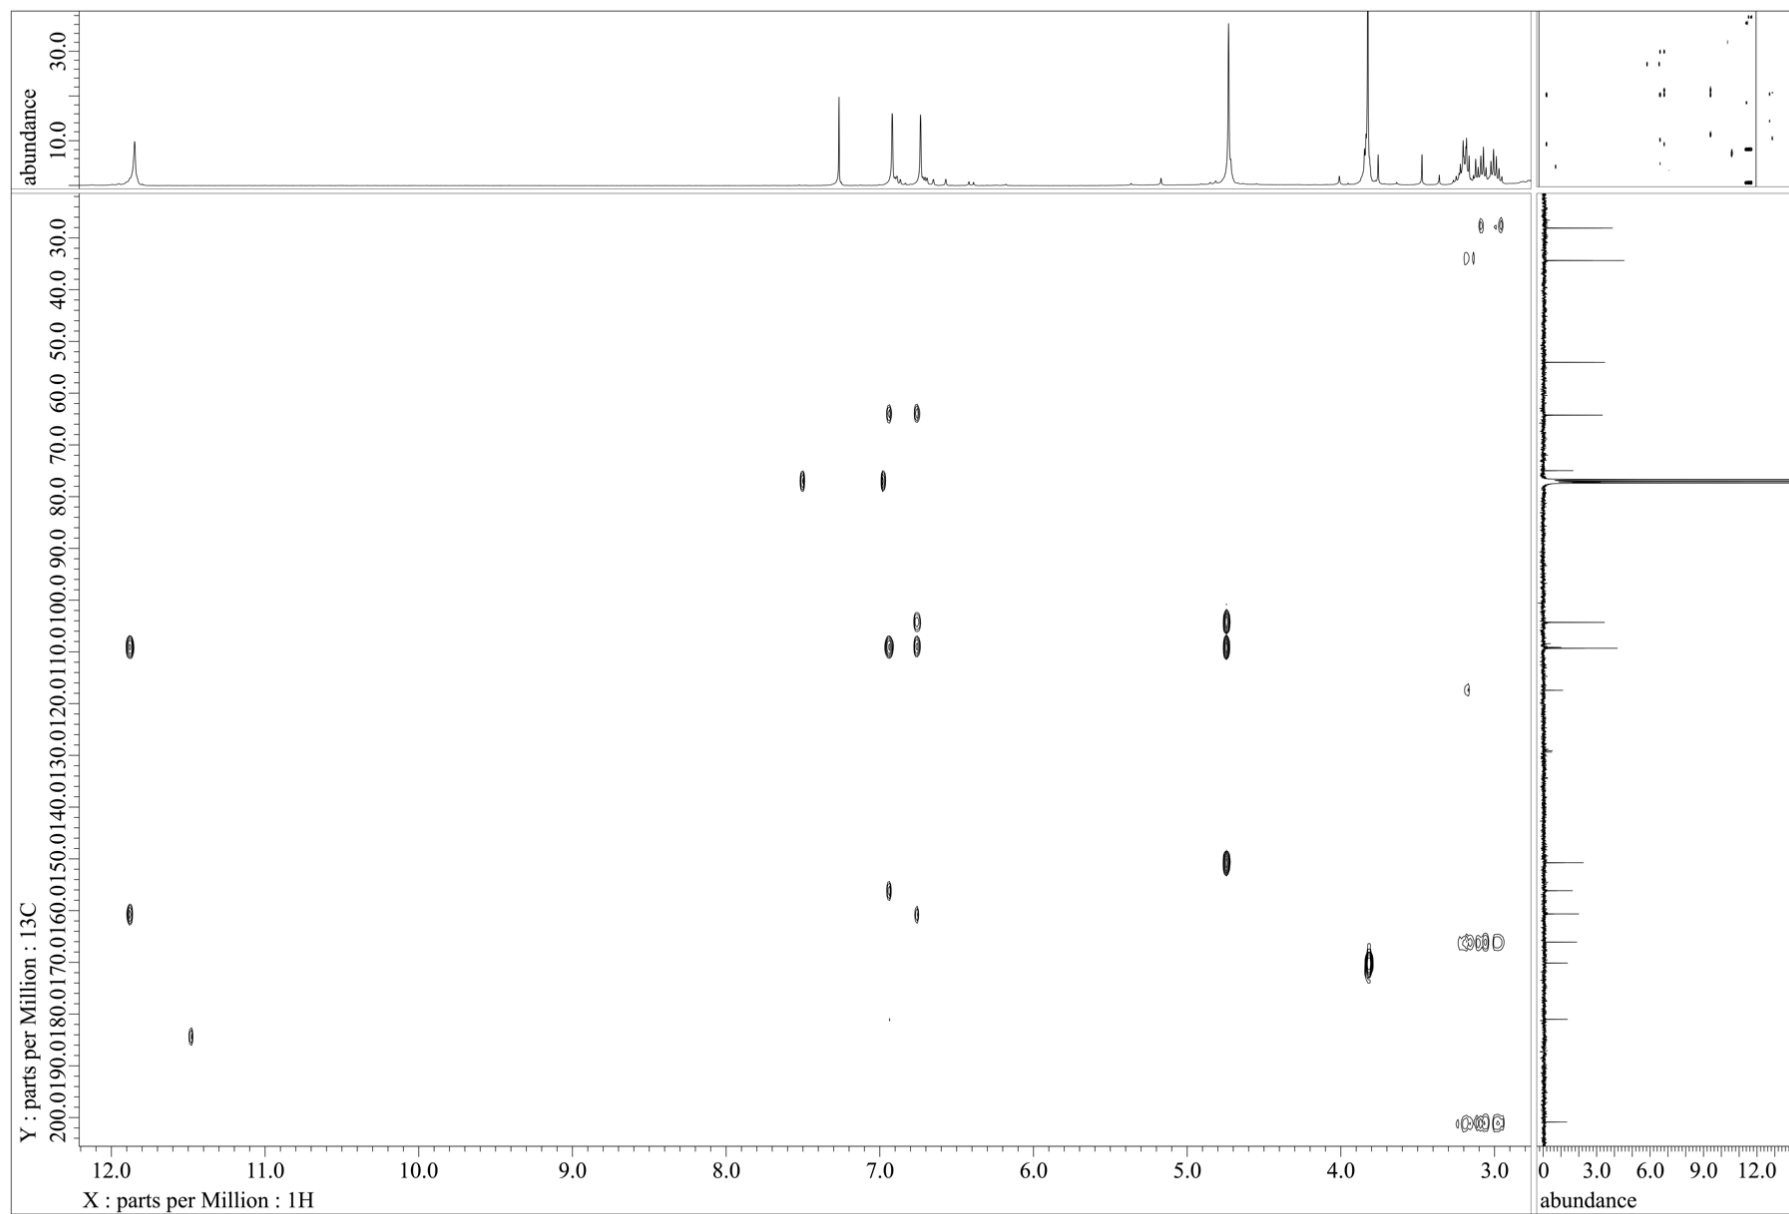

Figure S9: HMBC spectrum ( $\text{CDCl}_3$ ) of **2**.
